# Supplementary material
Source: PubMed Central journal article supplement (PMC4836432)
Supplement: AEM.00135-16_zam999117113so1.pdf [file AEM.00135-16_zam999117113so1.pdf]

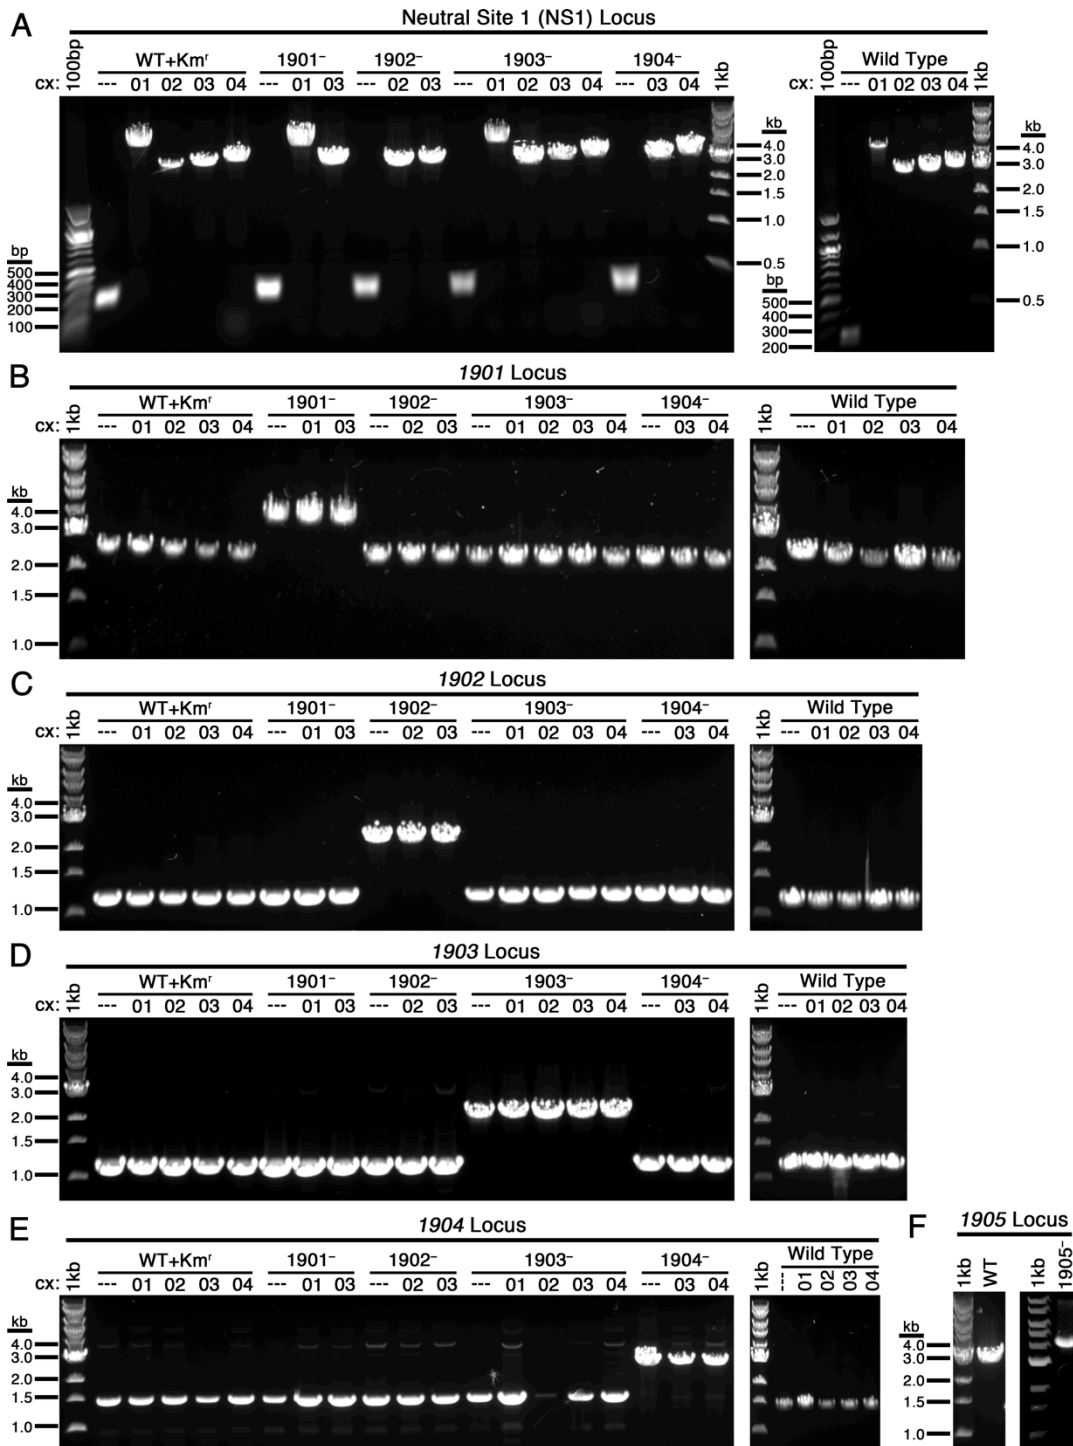

**FIG S1** Genotype confirmation via PCR amplification of genomic loci relevant to 1901 – 1905 mutants. PCR was performed on whole cells of *S. elongatus* strains using primers designed to test the composition and segregation of each locus of

interest (Table 2). The sample loaded in each lane is identified by a combination of the parental strain on top and the constitutive expression (cx) open reading frame (ORF) below (--- = WT NS1; 01 = 1901<sup>cx</sup>; 02 = 1902<sup>cx</sup>; 03 = 1903<sup>cx</sup>; 04 = 1904<sup>cx</sup>). In all PCR reactions, only a single band of the expected size was observed, confirming the genotype and segregation of the strains. A) PCR analysis of the NS1 locus. The expected size of the PCR products are: WT NS1 = 266 bp; 1901<sup>cx</sup> = 4.1 kb; 1902<sup>cx</sup> = 2.8 kb; 1903<sup>cx</sup> = 2.9 kb; and 1904<sup>cx</sup> = 3.1 kb. B) *1901* locus: WT = 2.5 kb; 1901<sup>-</sup> = 3.7 kb. C) *1902* locus: WT = 1.2 kb; 1902<sup>-</sup> = 2.4 kb. D) *1903* locus: WT = 1.2 kb; 1903<sup>-</sup> = 2.4 kb. E) *1904* locus: WT = 1.5 kb; 1904<sup>-</sup> = 2.7 kb. F) *1905* locus: WT = 3.0 kb; 1905<sup>-</sup> = 4.2 kb.

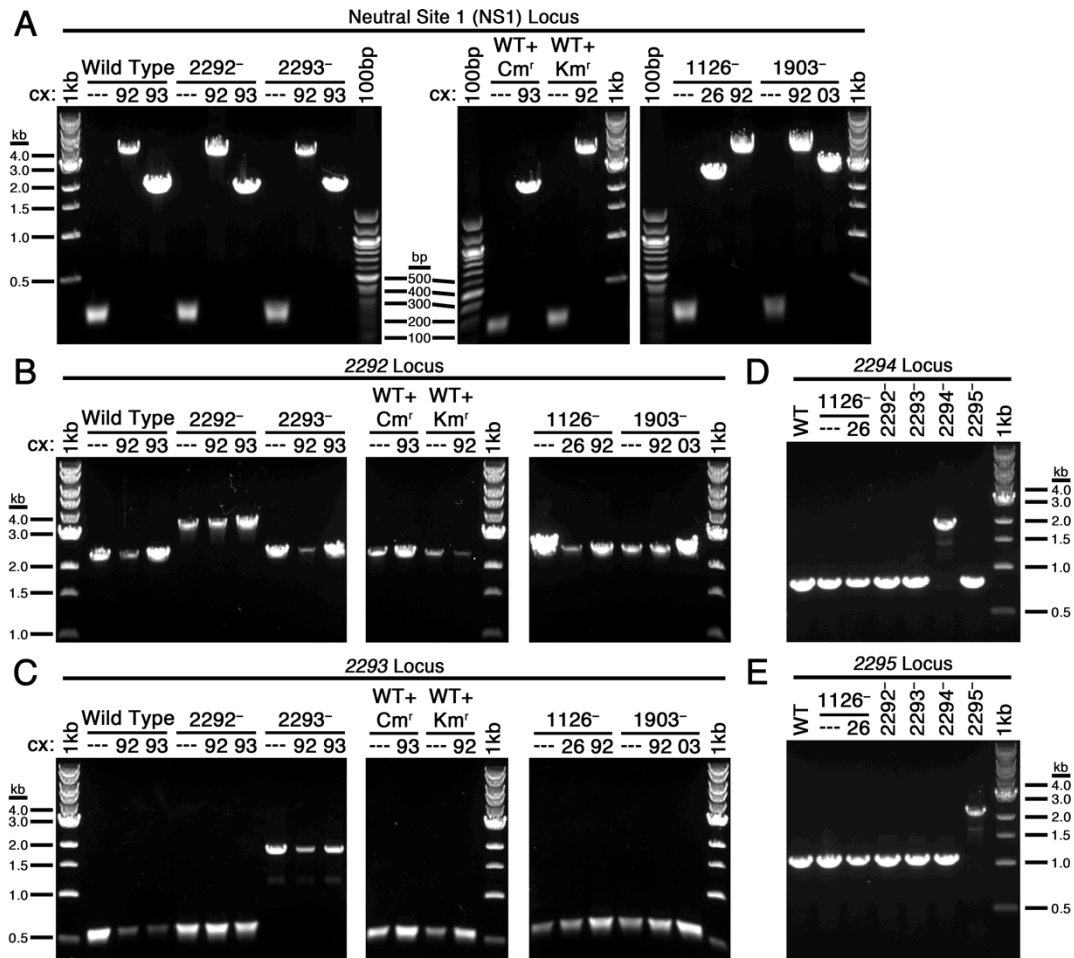

**FIG S2** Genotype confirmation via PCR amplification of genomic loci relevant to *2292* and *2293* mutants. PCR was performed as in Fig. S1. Gels are labeled as in Fig. S1 (--- = WT NS1; 92 = *2292*<sup>CX</sup>; 93 = *2293*<sup>CX</sup>; 03 = *1903*<sup>CX</sup>; 26 = *1126*<sup>CX</sup>). In all PCR reactions, only a single band of the expected size was observed, confirming the genotype and segregation of the strains. A) PCR analysis of the NS1 locus. The expected size of the PCR products are: WT NS1 = 266 bp; *2292*<sup>CX</sup> = 4.0 kb; *2293*<sup>CX</sup> = 2.2 kb; *1126*<sup>CX</sup> = 2.6 kb; and *1903*<sup>CX</sup> = 2.9 kb. B) *2292* locus: WT = 2.4 kb; *2292*<sup>-</sup> = 3.6 kb. C) *2293* locus: WT = 553 bp; *2293*<sup>-</sup> = 1.8 kb.

D) 2294 locus: WT = 837 bp; 2294<sup>-</sup> = 2.0 kb. E) 2295 locus: WT = 1.1 kb; 2295<sup>-</sup>  
= 2.3 kb.

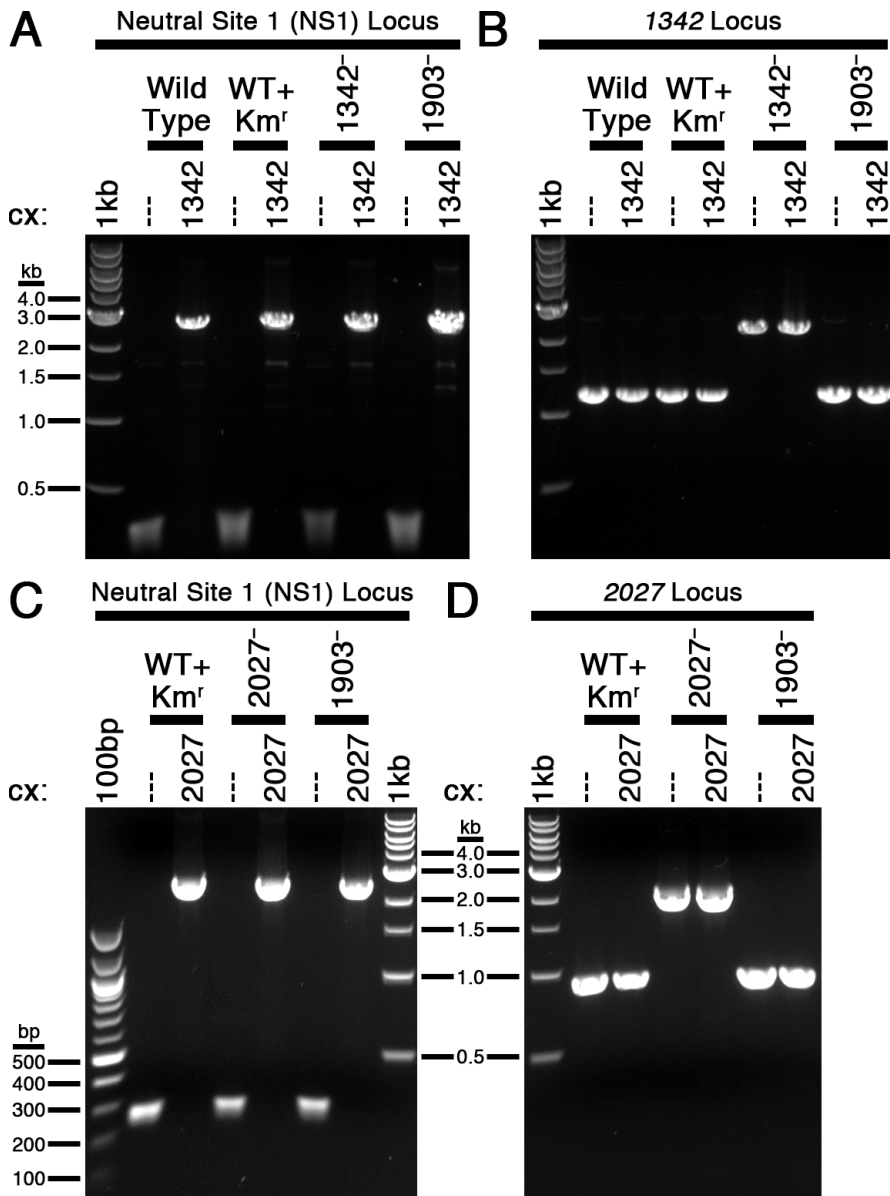

**FIG S3** Genotype confirmation via PCR amplification of genomic loci relevant to *1342* and *2027* mutants. PCR was performed as in Fig. S1. Gels are labeled as in Fig. S1. In all PCR reactions, only a single band of the expected size was observed, confirming the genotype and segregation of the strains. A) PCR analysis of the NS1 locus for *1342*-related strains. The expected size of the PCR products are: WT NS1 = 266 bp; *1342*<sup>cx</sup> = 2.8 kb. B) *1342* locus: WT = 1.1 kb;

1342<sup>-</sup> = 2.3 kb. C) NS1 locus for 2027-related strains: WT = 266 bp; 2027<sup>cx</sup> = 2.5

kb. D) 2027 locus: WT = 751 bp; 2027<sup>-</sup> = 2.0 kb.

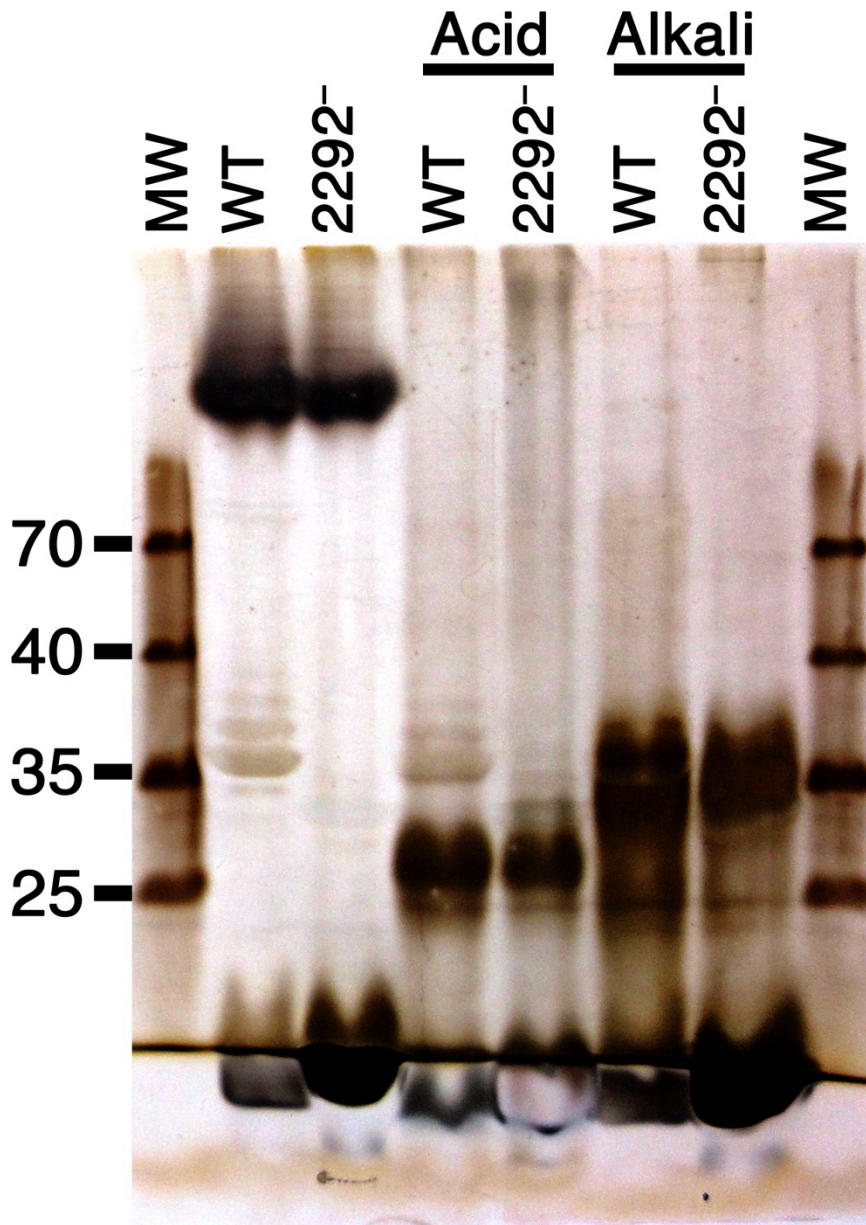

**FIG S4** Mild acid and alkali treatment of outer membrane purifications of WT and 2292<sup>-</sup>. Outer membrane samples were generated by the ultracentrifugation method of Simkovsky, et al. (1) and were treated with a mild acid or mild alkali treatment, as described in Rick, et al. (2). Samples were run on a SDS Tris-glycine gel as labeled. The molecular weight standard (MW) is marked in kilodaltons on the left.

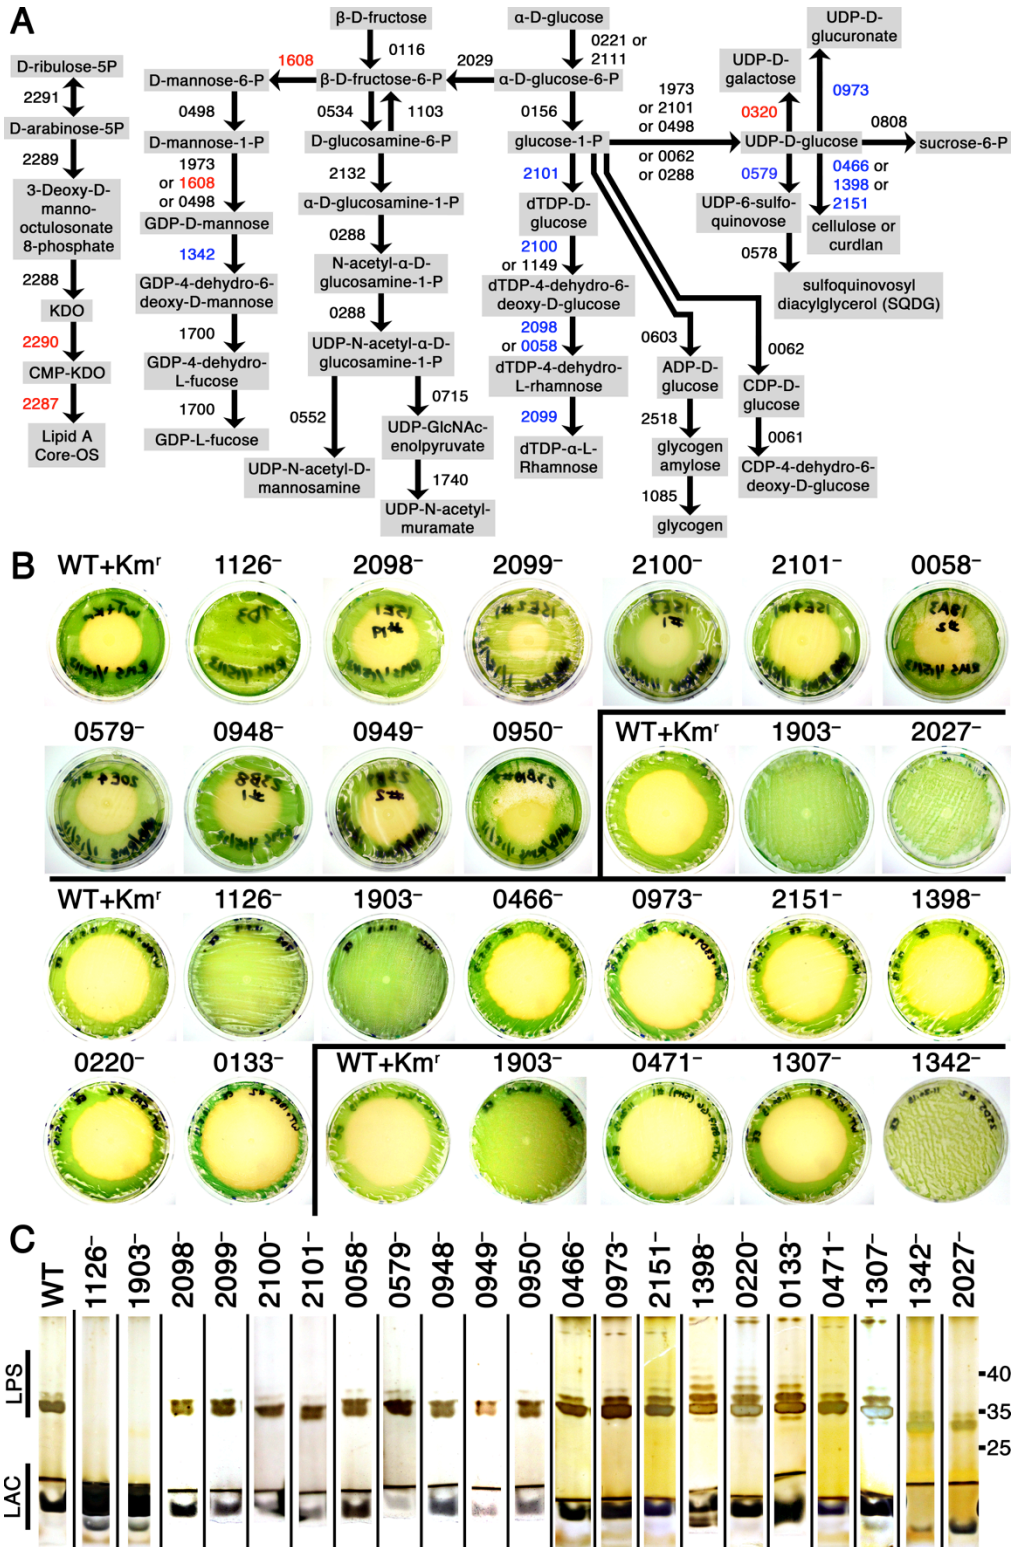

**FIG S5** Insertional transposon mutagenesis and phenotype analysis of putative sugar-nucleotide synthesis and polymerization genes. A) Metabolic map of steps



involved in sugar-nucleotide synthesis and polymerization based on KEGG pathways (3). Genes encoding *S. elongatus* PCC 7942 homologs of enzymes involved in each step are listed adjacent to the appropriate arrow. Gene names are colored blue if a segregated mutant was generated and confirmed, black if no mutations were attempted, and red if mutations were attempted but transformants or segregated clones could not be recovered. B) Amoeba grazing assays of segregated mutants and appropriate controls (WT+Km<sup>r</sup>, 1126<sup>-</sup>, and 1903<sup>-</sup>). Plates are grouped with appropriate controls by experimental batch due to slight variations in experimental conditions per batch, such as plate size or amoebae incubation time. C) SDS-PAGE analysis of outer membrane preparations from successfully generated mutants and previously characterized controls. The regions containing banding patterns that represent lipopolysaccharide (LPS) and lipid A-core (LAC) are indicated on the left while the positions of molecular weight standards are indicated on the right in kilodaltons.

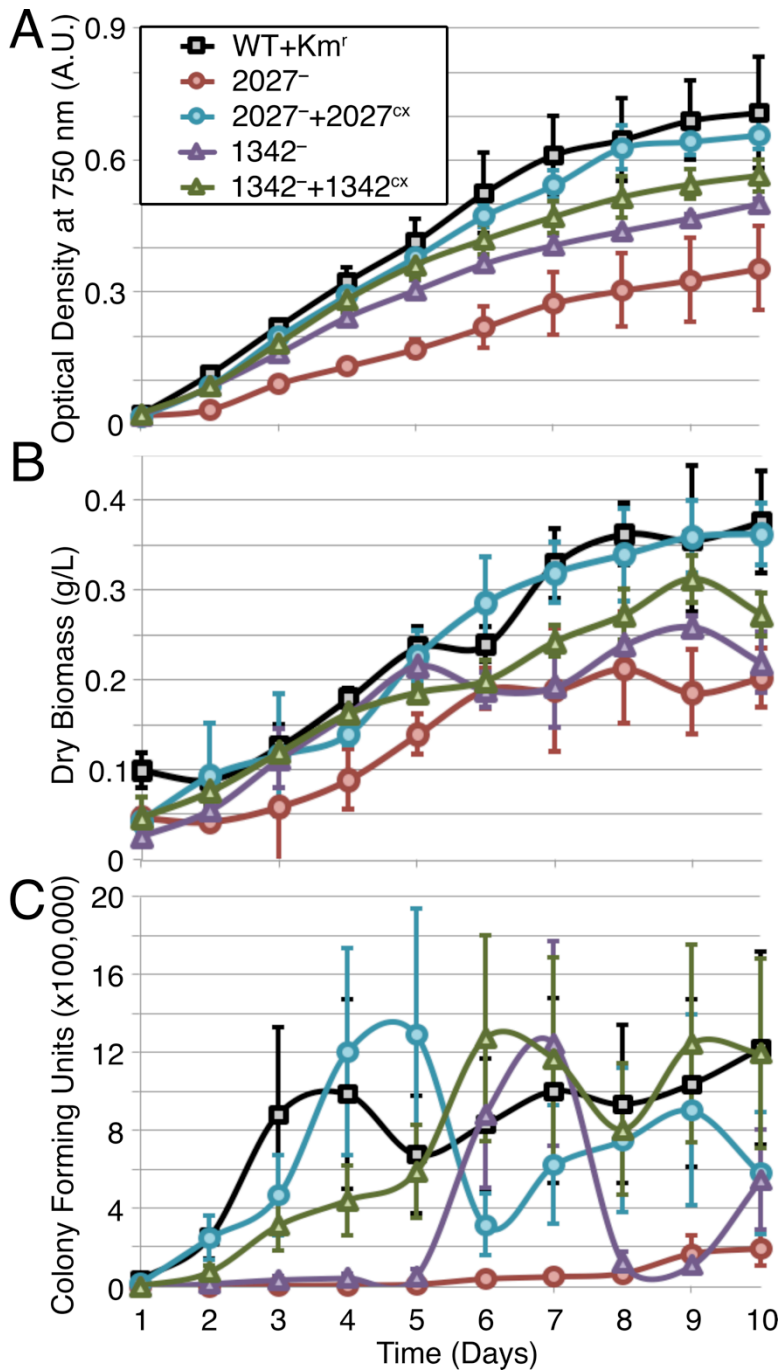

**FIG S6** Growth analysis of 2027<sup>-</sup> and 1342<sup>-</sup>. (A) Growth of flask cultures was measured by optical density at 750 nm over the course of 10 days. Because reductions in absorbance measurements may be due to the autoflocculation or clumping associated with previously characterized mutants (4), cell densities

were also measured by (B) dry biomass as previously described (1) and (C) colony forming units. Markers represent the average of biological triplicates; error bars represent the 95% confidence interval. Counts for 2027<sup>-</sup> and 1342<sup>-</sup> do not include larger, WT-like colonies (Fig. S7C).

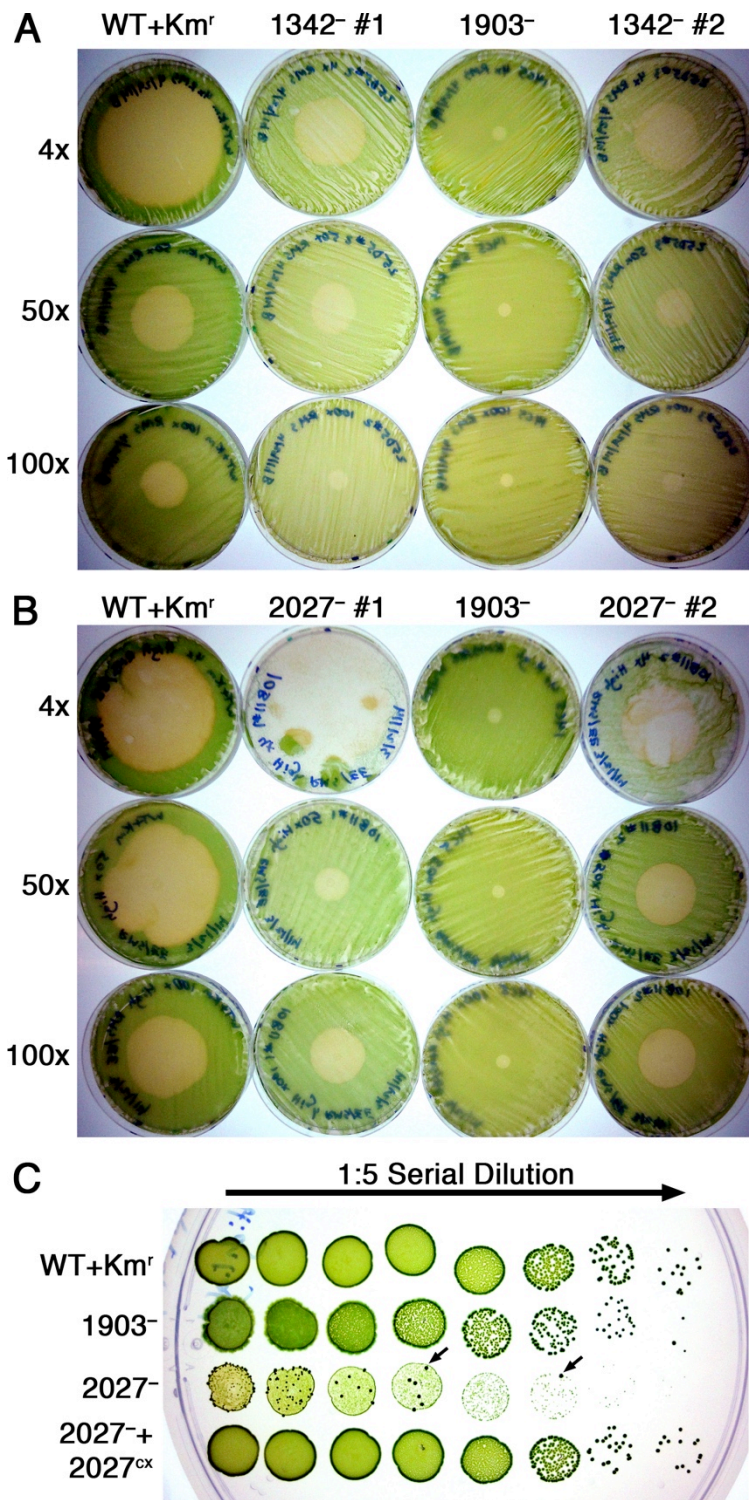

**FIG S7** Effects of initial cyanobacterial cell plating density and suppression of impaired growth phenotype on amoeba resistance. Lawn plates of replicate

clones of (A) 1342<sup>-</sup> and (B) 2027<sup>-</sup> mutants and control strains were seeded using 1 mL (4x), 12.5 mL (50x), or 25 mL (100x) of culture concentrated to a final volume of 250  $\mu$ l. After 6 d of growth, all plates were exposed to ~20,000 amoebae added to the center of each plate as a 4  $\mu$ l spot and incubated at 30 °C for 6 d prior to photographing the plates. (C) 1:5 serial dilution plate of 2027<sup>-</sup> and related strains generated for CFU analysis in Fig. S6C. In contrast to the small colonies observed in early time point samples of 2027<sup>-</sup> (Fig. 4B), colonies (arrows) growing like WT or the complemented strain 2027<sup>-</sup>+2027<sup>cx</sup> are present in the 2027<sup>-</sup> samples on this day 10 plate.

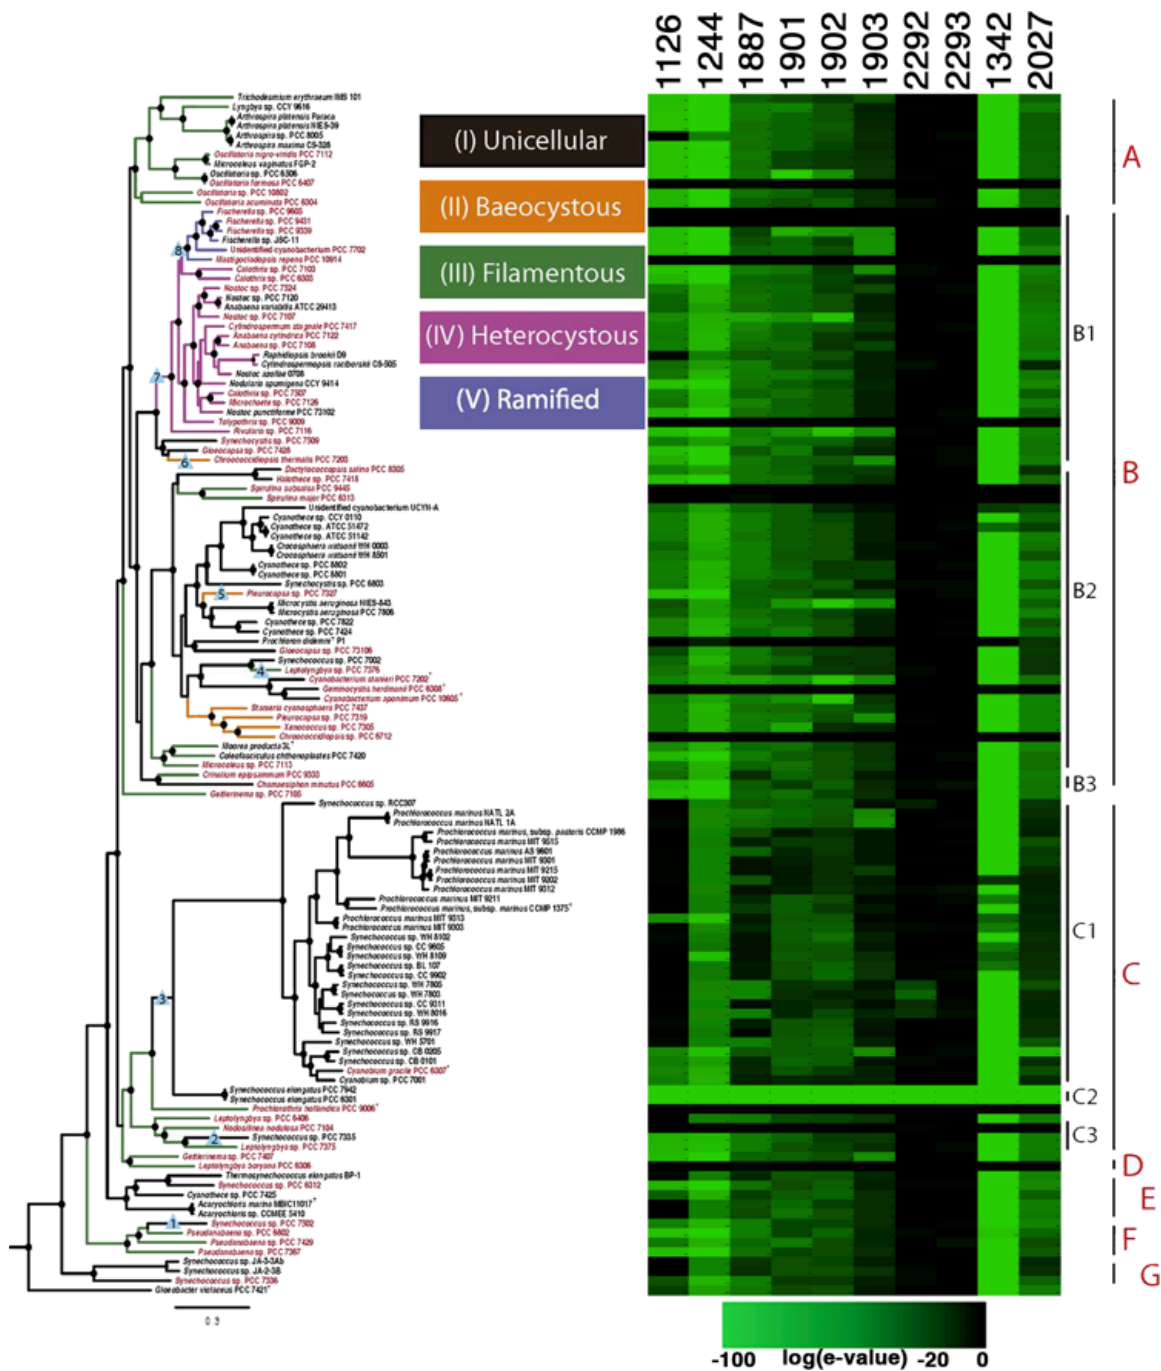

**FIG S8** Conservation of LPS synthesis genes across the sequenced cyanobacteria. Each *S. elongatus* PCC 7942 LPS synthesis gene (x-axis of the heat map) was used as a BLAST query to identify the most similar gene in every sequenced cyanobacteria (phylogenetic tree on the left,

adapted with permission from Shih, et al. (5)). The heat map is colored based upon the logarithm of the e-value of the top hit, with bright green representing a highly similar sequence and black representing the inability to discover any similar genes in that species.

**TABLE S1** Mutants impairing nucleotide-sugar production or polymerization that were attempted and their resulting phenotypes.

| <b>Gene</b> | <b>UGS Mutant</b> | <b>Predicted Function</b>                                                 | <b>Segregated Mutant Generated?</b> | <b>Mutant is resistant to HGG1 amoeba?</b> | <b>Mutant has altered LPS banding pattern?</b> |
|-------------|-------------------|---------------------------------------------------------------------------|-------------------------------------|--------------------------------------------|------------------------------------------------|
| <b>0058</b> | 18A3              | Synthesis of nucleotide activated rhamnose                                | Yes                                 | No                                         | No                                             |
| <b>0133</b> | 18E5              | Conserved transmembrane protein; conserved synteny with <i>0134</i>       | Yes                                 | No                                         | No                                             |
| <b>0134</b> | 18E7              | Wzy-like                                                                  | No                                  | --                                         | --                                             |
| <b>0220</b> | 5A3               | Putative Wzc protein                                                      | Yes                                 | No                                         | No                                             |
| <b>0281</b> | 19A8              | Glycosyltransferase, WecA-like                                            | No                                  | --                                         | --                                             |
| <b>0320</b> | 19C2              | Nucleotide activation of galactose                                        | No                                  | --                                         | --                                             |
| <b>0357</b> | 19E4              | Wzy-like                                                                  | No                                  | --                                         | --                                             |
| <b>0463</b> | 19G5              | Wzb-like                                                                  | No                                  | --                                         | --                                             |
| <b>0466</b> | 19G7              | Synthesis of cellulose or curdlan                                         | Yes                                 | No                                         | No                                             |
| <b>0471</b> | 5H9               | Permease protein of sugar ABC transporter                                 | Yes                                 | No                                         | No                                             |
| <b>0579</b> | 20E4              | sqdX, synthesis of sulfoquinovosyl diacylglycerol (6)                     | Yes                                 | No                                         | No                                             |
| <b>0948</b> | 23B8              | Permease protein of sugar ABC transporter                                 | Yes                                 | No                                         | No                                             |
| <b>0949</b> | 23B9              | Permease protein of sugar ABC transporter                                 | Yes                                 | No                                         | No                                             |
| <b>0950</b> | 23B10             | Sugar transport substrate binding protein                                 | Yes                                 | No                                         | No                                             |
| <b>0973</b> | 23D9              | Synthesis of nucleotide activated glucuronate                             | Yes                                 | No                                         | No                                             |
| <b>1307</b> | 25A7              | ABC transport permease, possibly of oligosaccharides                      | Yes                                 | No                                         | No                                             |
| <b>1342</b> | 25D5              | Synthesis of nucleotide activated fucose                                  | Yes                                 | Yes                                        | Yes                                            |
| <b>1398</b> | 25H6              | Synthesis of cellulose or curdlan                                         | Yes                                 | No                                         | No                                             |
| <b>1608</b> | 12D5              | Nucleotide activation or synthesis of mannose                             | No                                  | --                                         | --                                             |
| <b>1761</b> | 13G6              | ToIC-like Type I secretion protein                                        | No                                  | --                                         | --                                             |
| <b>2025</b> | 14H11             | Glycosyltransferase type 1                                                | No                                  | --                                         | --                                             |
| <b>2027</b> | 10B11             | Glycosyltransferase type 2                                                | Yes                                 | Yes                                        | Yes                                            |
| <b>2028</b> | 10B12             | Glycosyltransferase type 1                                                | No                                  | --                                         | --                                             |
| <b>2098</b> | 15E1              | Synthesis of nucleotide activated rhamnose                                | Yes                                 | No                                         | No                                             |
| <b>2099</b> | 15E2              | Synthesis of nucleotide activated rhamnose                                | Yes                                 | No                                         | No                                             |
| <b>2100</b> | 15E3              | Synthesis of nucleotide activated rhamnose                                | Yes                                 | No                                         | No                                             |
| <b>2101</b> | 15E4              | Nucleotide activation of glucose                                          | Yes                                 | No                                         | No                                             |
| <b>2148</b> | 10D4              | ATPase of ABC transporter system; conserved synteny with 2149 transporter | No                                  | --                                         | --                                             |
| <b>2149</b> | 2E11              | ABC transport permease, possibly of oligosaccharides                      | No                                  | --                                         | --                                             |
| <b>2150</b> | 2E12              | Choloylglycine hydrolase, affecting envelope and host-interaction (7)     | No                                  | --                                         | --                                             |
| <b>2151</b> | 2F1               | Synthesis of cellulose or curdlan                                         | Yes                                 | No                                         | No                                             |
| <b>2287</b> | 3C1               | Glycosyltransferase or polymerase of KDO                                  | No                                  | --                                         | --                                             |
| <b>2290</b> | 10E7              | Nucleotide activation of KDO                                              | No                                  | --                                         | --                                             |



## Supplementary References

1. **Simkovsky R, Daniels EF, Tang K, Huynh SC, Golden SS, Brahamsha B.** 2012. Impairment of O-antigen production confers resistance to grazing in a model amoeba-cyanobacterium predator-prey system. *Proc Natl Acad Sci U S A* **109**:16678-16683.
2. **Rick PD, Hubbard GL, Barr K.** 1994. Role of the *rfe* gene in the synthesis of the O8 antigen in *Escherichia coli* K-12. *J Bacteriol* **176**:2877-2884.
3. **Kanehisa M, Goto S, Sato Y, Kawashima M, Furumichi M, Tanabe M.** 2014. Data, information, knowledge and principle: back to metabolism in KEGG. *Nucleic Acids Res* **42**:D199-205.
4. **Salim S, Bosma R, Vermue MH, Wijffels RH.** 2011. Harvesting of microalgae by bio-flocculation. *J Appl Phycol* **23**:849-855.
5. **Shih PM, Wu D, Latifi A, Axen SD, Fewer DP, Talla E, Calteau A, Cai F, Tandeau de Marsac N, Rippka R, Herdman M, Sivonen K, Coursin T, Laurent T, Goodwin L, Nolan M, Davenport KW, Han CS, Rubin EM, Eisen JA, Woyke T, Gugger M, Kerfeld CA.** 2013. Improving the coverage of the cyanobacterial phylum using diversity-driven genome sequencing. *Proc Natl Acad Sci U S A* **110**:1053-1058.
6. **Guler S, Essigmann B, Benning C.** 2000. A cyanobacterial gene, *sqdX*, required for biosynthesis of the sulfolipid sulfoquinovosyldiacylglycerol. *J Bacteriol* **182**:543-545.

7. **Marchesini MI, Connolly J, Delpino MV, Baldi PC, Mujer CV, DelVecchio VG, Comerci DJ.** 2011. *Brucella abortus* choloylglycine hydrolase affects cell envelope composition and host cell internalization. PLoS One **6**:e28480.
